# Supplementary material for: Toward universal cell embeddings: integrating single-cell RNA-seq datasets across species with SATURN
Source: PubMed Central journal article supplement (PMC11310084; doi:10.1038/s41592-024-02191-z), 2024-02-16
Supplement: 41592_2024_2191_MOESM1_ESM.pdf [file 41592_2024_2191_MOESM1_ESM.pdf]

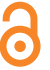

---

# Toward universal cell embeddings: integrating single-cell RNA-seq datasets across species with SATURN

---

In the format provided by the  
authors and unedited

Supplementary materials for

# **Towards Universal Cell Embeddings: Integrating Single-cell RNA-seq Datasets across Species with SATURN**

Yanay Rosen<sup>1,\*</sup>, Maria Brbić<sup>2,\*</sup>, Yusuf Roohani<sup>3,\*</sup>, Kyle Swanson<sup>1</sup>, Ziang Li<sup>4</sup>, Jure Leskovec<sup>1,†</sup>

<sup>1</sup> Department of Computer Science, Stanford University, Stanford, CA, USA

<sup>2</sup> School of Computer and Communication Sciences, Swiss Federal Institute of Technology (EPFL), Lausanne, Switzerland

<sup>3</sup> Department of Biomedical Data Science, Stanford University, Stanford, CA, USA

<sup>4</sup> Department of Computer Science and Technology, Tsinghua University, Beijing, China

†Corresponding author. Email: [jure@cs.stanford.edu](mailto:jure@cs.stanford.edu)

\*These authors contributed equally

This PDF file includes:

Supplementary Notes 1 to 6

Supplementary Figures 1 to 5

Supplementary Tables 1 to 3

Supplementary References

## **Supplementary Note 1 Datasets and preprocessing**

We downloaded publicly available count matrix files with cell type annotations (see data availability). For integrating Tabula Sapiens <sup>1</sup>, Tabula Microcebus <sup>2</sup> and Tabula Muris <sup>3</sup> we filtered cell types to select cell types with more than 350 cells. Additionally, we filtered cells with fewer than 500 genes expressed and filtered genes expressed in fewer than 1000 cells. For frog and zebrafish embryogenesis, we filtered cells with fewer than 500 genes expressed, and filtered genes that were expressed in fewer than 10 cells. For the Aqueous Humor Outflow cell atlas no additional gene or cell filtering was done. We selected highly variable genes in each dataset using the Seurat v3 method <sup>4</sup>. We set only number of genes (Supplementary Note 4), while we keep all other parameters to their default values in scanpy package <sup>5</sup>. No additional data preprocessing was performed and the numerical inputs to SATURN are raw counts.

## **Supplementary Note 2 Baseline methods**

We compare SATURN to four existing single cell integration methods, SAMap, Harmony, scVI and Scanorama. SAMap is run in a semi-supervised mode in which cell neighborhoods are determined by cell types. Harmony <sup>6</sup>, scVI <sup>7</sup>, and Scanorama <sup>8</sup> are all run with default settings, using one-to-one homolog genes, and with the batch variable being species (frog or zebrafish). For scVI, Harmony and Scanorama, no additional highly variable gene selection was performed as the number of one-to-one homologs was low (7175). SAMap defaults to 3000 highly variable genes for each species, as determined by their SAM weights.

### Supplementary Note 3 Evaluation

There are a variety of different ways to assess the quality of a multi-species embedding. A multi-species embedding should encode cells that are the same cell type close together and cells from different cell types far apart. Cell types that are shared across species should have similar embeddings, and cell types that are unique to a species should not be falsely paired with other cell types.

We therefore assess the quality of multi-species embeddings for the goal of transferring labels from one species to another. Given a species  $s^1$  with distinct cell types  $T^1$ , labels are transferred to a new species  $s^2$  with cell types  $T^2$  using a cell type classifier trained on the embeddings of cells from  $s^1$ . The simple classification model  $C_{s^1}(\mathbf{z}_c) : \mathbb{R} \rightarrow T^1$  is trained on embeddings of one species  $s^1$ , and evaluated on embeddings of another species  $s^2$ . Predictions are classified as accurate based on a predetermined mapping of cell types  $T^1 \rightarrow T^2$  between species (Supplementary Table 2).

$$C_{s^1} := \text{Logistic Regression Model}(\mathbf{z}_{c \in s^1}) \sim T_{c \in s^1}^1 \quad (1)$$

$$\hat{T}_{c \in s^2}^1 = C_{s^1}(\mathbf{z}_{c \in s^2}) \quad (2)$$

$$\text{Accuracy} = \frac{1}{|c \in s^2|} \sum_{c \in s^2} \mathbb{1}(\hat{T}_c^1 \text{ maps to } T_c^2) \quad (3)$$

## Supplementary Note 4 Hyperparameters

**Hyperparameters.** In SATURN, we set the number of highly variable genes to 8000. For integrating frog and zebrafish embryogenesis datasets and integrating the AH atlas, the number of macrogenes  $|\mathcal{M}|$  is 2000. For integrating tissue subsets of the mammalian atlas datasets, the number of macrogenes is 3000. This dataset requires integration of fine-grained cell types from closely related species so we set the number of macrogenes to higher value. Intuitively, a higher number of macrogenes may help in finding finer-level differences between cell types, as an increased number of macrogenes will result in a more specific gene grouping. However, increasing the number of macrogenes past a certain point could reduce interpretability as the macrogenes may become too specific and consist of single genes. Since we are reducing the original high-dimensional gene space from all species in the macrogene space, we do not recommend using fewer than 1000 macrogenes. The encoder embedding dimension,  $k$  is set at 256 for all experiments. The hidden dimension for all other layers used during pretraining is 256. We use Adam optimizer with learning rate 0.0005 during pretraining and 0.001 during fine-tuning with metric learning.

To generate the coarse alignment of mammalian cell atlases in Fig. 1b, SATURN was run with 8000 highly variable genes per species, 2000 macrogenes, an embedding dimension  $k$  of 256 and a hidden dimension of 256. An additional categorical covariate was added to the embedding dimension, representing the tissue of origin. All UMAP visualizations are generated using default values in scanpy package <sup>5</sup>. We generate UMAP embeddings with randomized plotting order in Supplementary Fig. 1.

## **Supplementary Note 5 Gene Ontology enrichment analysis**

Gene Ontology (GO) analysis could additionally confirm functionally meaningful groups of macrogenes. However, the challenge is that many species do not have well annotated GO terms and mapping GO terms across different species is non-trivial. Thus, we performed GO term enrichment analysis between human and mouse in the mammalian cell atlas, since human and mouse genes are best annotated in the GO. To create gene sets, for each macrogene we took the set of a given species' (either mouse or human) genes that had weights from a gene to macrogene above a cutoff of 0.5. From these, to ensure gene sets had a sufficient size for enrichment analysis, we selected gene sets with 10 or more genes, and ran GO enrichment analysis using the GOATOOLS Python package<sup>9</sup>.

Using this approach, 88 human gene sets and 79 mouse gene sets were created. GO enrichment analysis on the human gene sets found an average of 2.05 biological process (BP) terms, 1.35 molecular function (MF) terms and 1.88 cellular component (CC) terms that were enriched at a significant level ( $p=0.05$ , FDR BH corrected, default parameters) per human gene set. Enrichment analysis on the mouse gene sets found an average of 4.10 BP terms, 2.38 MF terms and 2.86 CC significant terms per mouse gene set. In the null distribution of random assignment of genes, 0 sets had significant terms of any kind. Moreover, we found 14 macrogenes for which we could create gene sets for both human and mouse. In 11/14 of these macrogenes we found at least one significantly enriched GO term in common between the mouse and human sets when performing string-based matching of terms.

## Supplementary Note 6 Macrogene initialization functions

**Default initialization.** By default, SATURN initializes macrogenes by soft-clustering protein embeddings. In particular, SATURN first clusters protein embeddings using the K-Means algorithm<sup>10</sup>. Given a matrix that stores protein embeddings for all genes  $\mathbf{P} \in \mathbb{R}^{|\mathcal{G}| \times p}$ , SATURN applies K-Means to learn a set of centroids  $\mathcal{M} = \{\mathbf{m}_i \in \mathbb{R}^p\}_{i=1}^{N_M}$  where  $N_M$  defines the number of centroids/macrogenes. K-means minimizes the within-cluster sum of squares:

$$\sum_{g \in \mathcal{G}} \min_{\mathbf{m} \in \mathcal{M}} (\|\mathbf{P}_g - \mathbf{m}\|^2), \quad (4)$$

where  $\mathbf{P}_g$  denotes a row protein embedding vector of matrix  $\mathbf{P}$ . Here, each centroid  $\mathbf{m}$  represents a different macrogene. SATURN then defines an initial set of weights  $\{\{\mathbf{W}_{g,m} \in \mathbb{R}_+\}_{g=1}^{|\mathcal{G}|}\}_{m=1}^{|\mathcal{M}|}$  from each gene  $g$  to each macrogene  $m$  as:

$$\mathbf{W}_{g,m} = 2 * \left( \log \left( \frac{1}{\text{rd}_{m,g}} + 1 \right) \right)^2, \quad (5)$$

where  $\text{rd}_{m,g} : \mathbb{N} \rightarrow \mathbb{N}$  represents the ranked euclidean distance from gene  $g$  to a macrogene  $m$  and  $\text{rd}_{m,g} = 1$  for the nearest gene to a macrogene. This initialization function is arbitrarily chosen so that genes have the highest weights to the macrogenes they are closest to. Gene to macrogene weights are strictly positive, differentiable and updated during pretraining. We multiply by two so that the highest weights are close to 1.

**Additional Functions.** We benchmark two additional initialization functions, a smoother function and an all-or-nothing “one-hot” function, which perform similarly (Supplementary Fig. 4).

For the more smoothed initialization function, the weights  $\{\{\mathbf{W}_{g,m} \in \mathbb{R}_+\}_{g=1}^{|\mathcal{G}|}\}_{m=1}^{|\mathcal{M}|}$  from each gene  $g$  to each macrogene  $m$  are set as:

$$\mathbf{W}_{g,m} = \frac{1}{\text{rd}_{m,g}} \quad (6)$$

For the one hot initialization function, the weights  $\{\{\mathbf{W}_{g,m} \in \mathbb{R}_+\}_{g=1}^{|\mathcal{G}|}\}_{m=1}^{|\mathcal{M}|}$  from each gene  $g$  to each macrogene  $m$  are set as:

$$\mathbf{W}_{g,m} = \mathbb{1}(\text{rd}_{m,g} = 1) \quad (7)$$



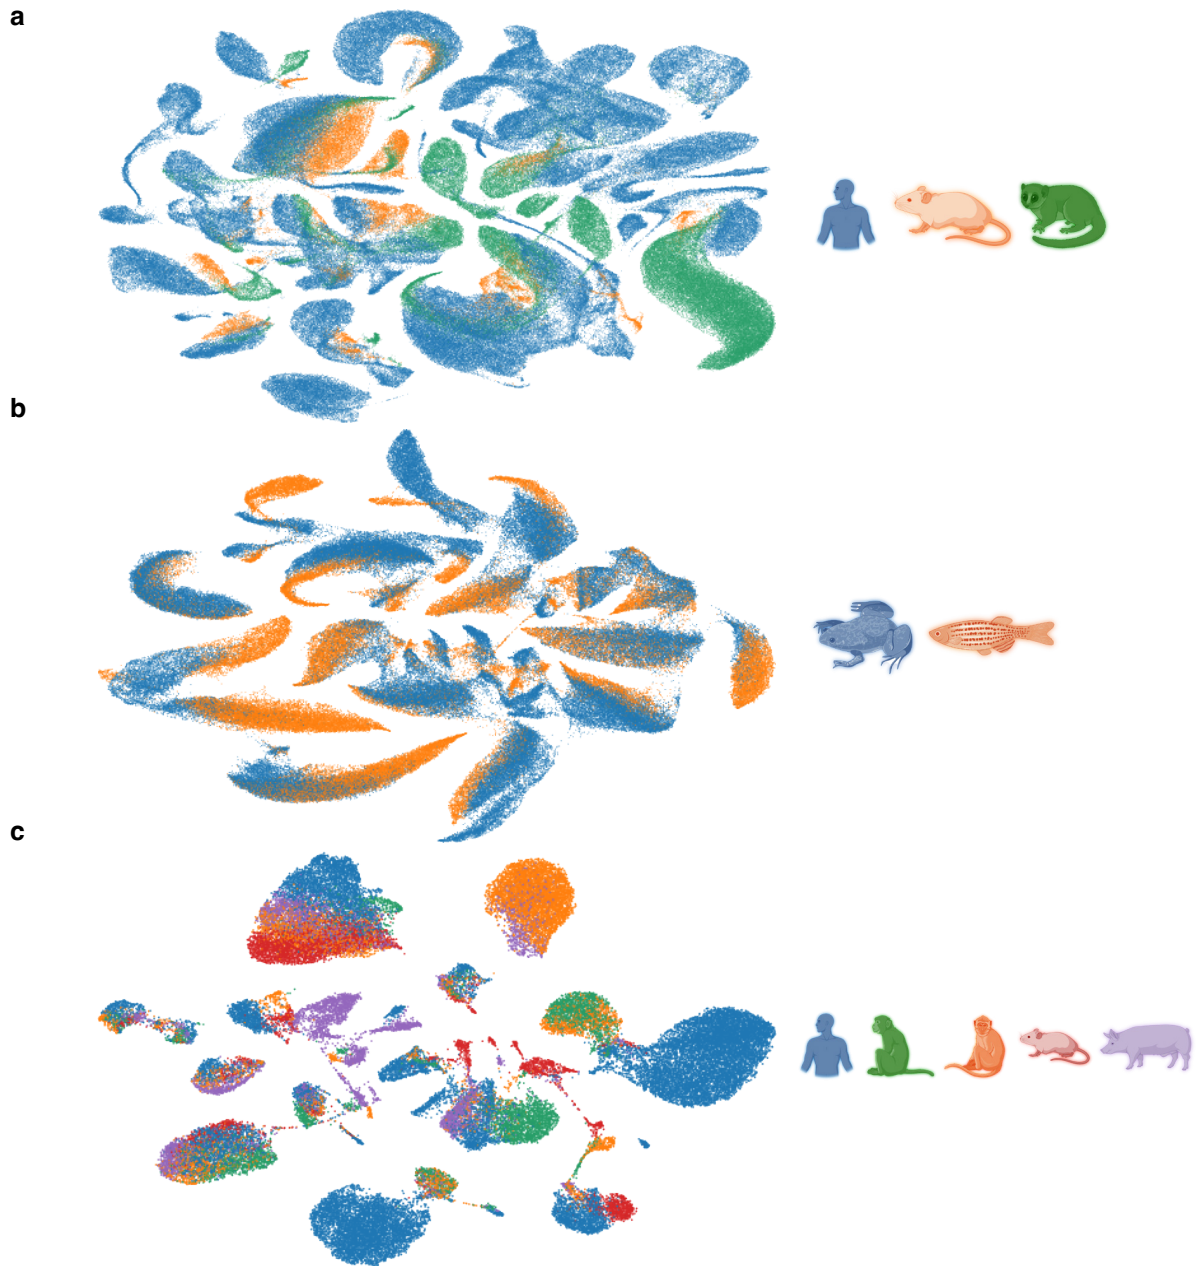

**Supplementary Figure 1: SATURN embeds multi species datasets.** UMAP embeddings of (a) mammalian cell atlas, (b) frog and zebrafish embryogenesis datasets and (c) Aqueous Humor Outflow cell atlas. UMAPs are generated using default parameters but plotting order is randomized.

**a**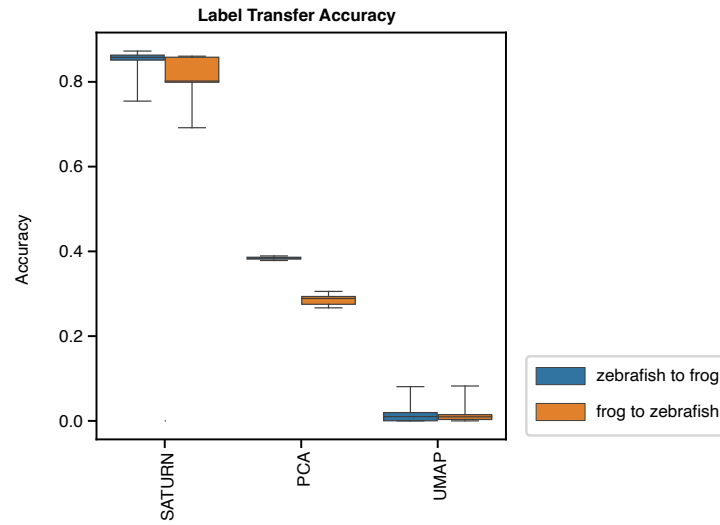**b**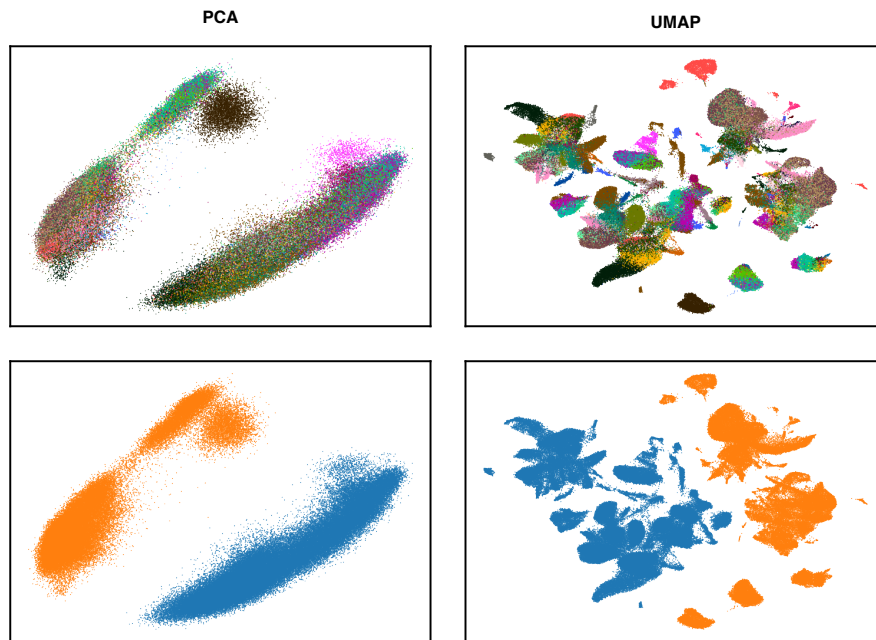

**Supplementary Figure 2: SATURN outperforms UMAP and PCA for cross species integration.** (a) Performance comparison of SATURN versus PCA and UMAP on frog and zebrafish embryogenesis datasets. PCA is calculated using the one-to-one homolog genes as determined by BLAST, followed by expression log normalization. UMAP is then calculated using those top 50 principal components. The distribution is obtained with n=30 runs for each method, by setting a random seed and shuffling the data. **B** Visualization of PCA (left) and UMAP (right) embeddings by cell type (top) and species (bottom). For PCA, the top two principal components are used.

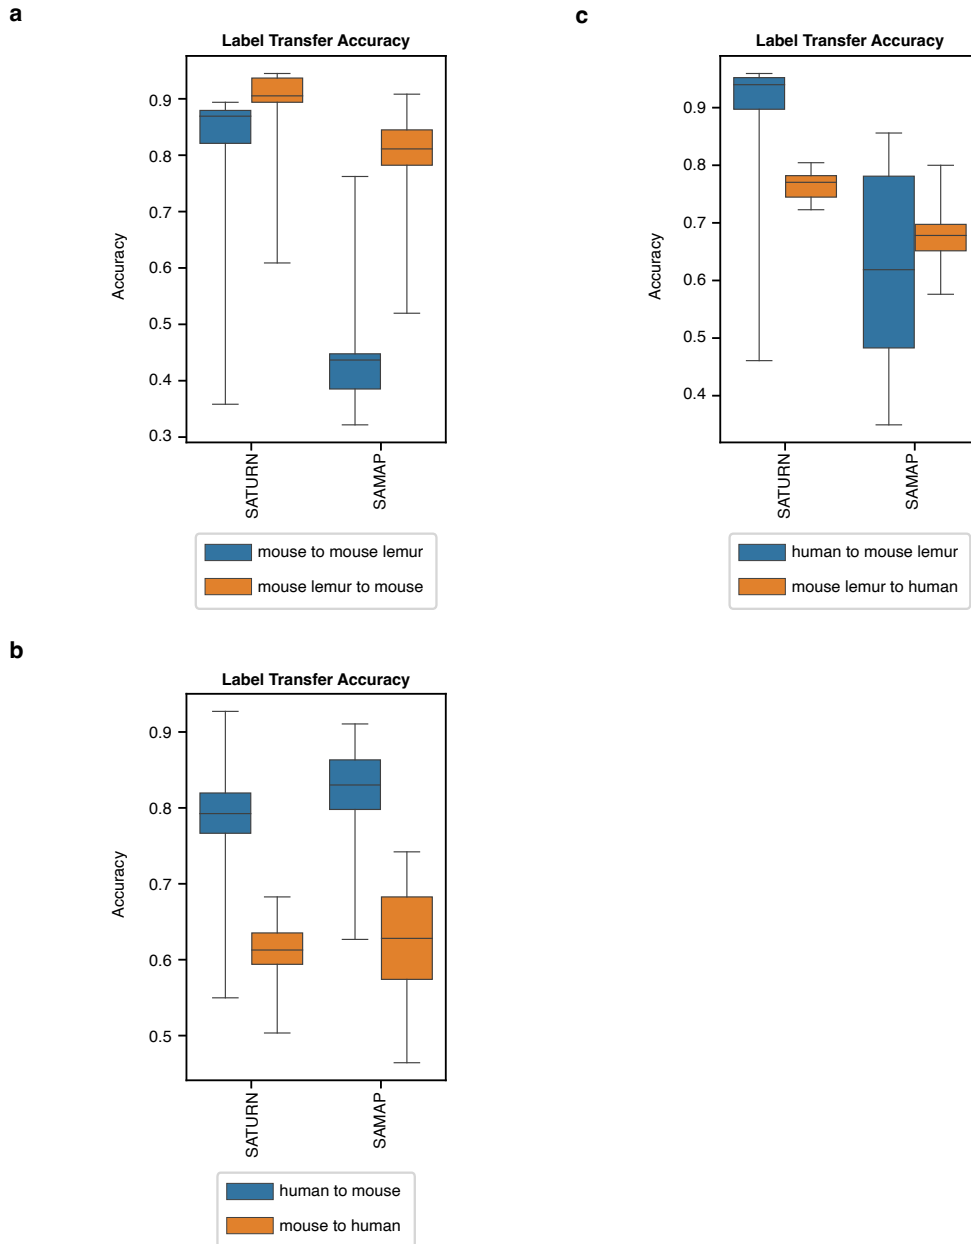

**Supplementary Figure 3: Performance of SATURN and the second best baseline SAMap on transferring annotations on the mammalian cell atlas.** Performance is evaluated using the prediction accuracy of a logistic classifier model trained to differentiate cell types of one species and tested on predicting the cell type annotations of another species. Higher values indicate better performance. SAMap represents a version of the SAMap method in which cell-type annotations are used to integrate datasets. The distribution is obtained with  $n=30$  runs for each method. Performance when transferring annotations from **(a)** mouse to mouse lemur, **(b)** human to mouse, and **(c)** human to mouse lemur.

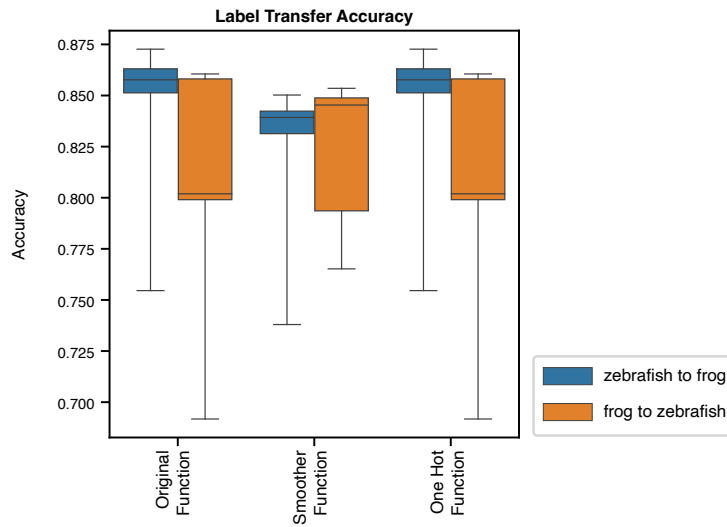

**Supplementary Figure 4: SATURN is robust to choice of macrogene initialization function.**

Median performance of SATURN with different macrogene initialization functions evaluated as accuracy of the label transfer between frog and zebrafish embryogenesis datasets. Blue boxplots show zebrafish to frog label transfer performance, while orange boxplots show frog to zebrafish label transfer performance. Distribution is estimated with  $n = 30$  runs.

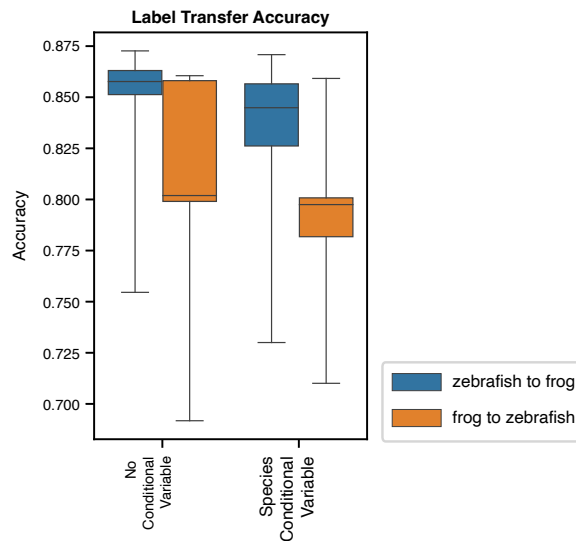

**Supplementary Figure 5: Conditional species variable does not improve performance.** Performance of SATURN using a conditional autoencoder during pretraining with a species conditional variable vs a constant variable. The constant variable is appended to the embedding  $z_c$ , while in the conditional variable setting, a one hot representation of the species  $s$  is concatenated to the embedding. Blue boxplots show zebrafish to frog label transfer performance, while orange boxplots show frog to zebrafish label transfer performance. Distribution is estimated with  $n = 30$  runs.

**Macrophage and  
Myeloid Progenitors**

| <b>Arhgd1</b>        |              | <b>Cebp</b>     |            | <b>Ptp</b>        |            | <b>Cybb</b>       |             | <b>Lcp1</b>      |            |
|----------------------|--------------|-----------------|------------|-------------------|------------|-------------------|-------------|------------------|------------|
| gene                 | weight       | gene            | weight     | gene              | weight     | gene              | weight      | gene             | weight     |
| frog_arhgd1b         | 2.0586648    | frog_cebpd      | 1.7377852  | frog_ptprc        | 1.0184758  | frog_cybb         | 1.4121561   | frog_lcp1        | 1.1437993  |
| zebrafish_arhgd1g    | 1.1892534    | frog_cebpb      | 1.2713358  | zebrafish_ptprc   | 1.0062823  | zebrafish_cybb    | 0.98110956  | zebrafish_parvg  | 0.95570034 |
| frog_arhgd1g         | 0.82862365   | zebrafish_cebpa | 1.2589424  | frog_iqcd         | 1.0023459  | frog_nox4         | 0.69433695  | zebrafish_parvb  | 0.8877349  |
| frog_arhgd1a         | 0.42018056   | zebrafish_cebpb | 1.1590556  | frog_ptpn6        | 0.975968   | frog_nox1         | 0.6060228   | frog_parva       | 0.8088149  |
| frog_c20orf27        | 0.012586672  | frog_mafb       | 0.777314   | zebrafish_ptpreb  | 0.95713043 | frog_nox5         | 0.016699424 | zebrafish_lcp1   | 0.7965079  |
| frog_arr3            | 0.011929505  | zebrafish_cebpd | 0.6585815  | zebrafish_ptpn6   | 0.9493796  | frog_nadk         | 0.012460865 | frog_parvb       | 0.7859018  |
| zebrafish_abracl     | 0.0018043627 | frog_cebpa      | 0.49666032 | zebrafish_ptpn22  | 0.88780427 | zebrafish_slc7a8a | 0.008461936 | frog_parvg       | 0.6744168  |
| zebrafish_c7h20orf27 | 0.0017385085 | zebrafish_mafbb | 0.3763802  | zebrafish_ptpn11b | 0.5531652  | frog_rac2         | 0.006649947 | zebrafish_parvab | 0.62013125 |
| zebrafish_arr3b      | 0.0011982815 | zebrafish_cebpb | 0.2561873  | zebrafish_ptpr    | 0.533596   | zebrafish_slc7a7  | 0.006204006 | zebrafish_gas2l2 | 0.2786125  |
| zebrafish_cst14b.1   | 0.0007732745 | frog_maf        | 0.2419157  | frog_ptprh        | 0.39319068 | frog_tfb1m        | 0.006183132 | zebrafish_tagln  | 0.11108811 |

  

| <b>Ionocytes</b> |            | <b>Dmrt2</b>     |            | <b>Cldn</b>       |            | <b>Ubp1</b>       |            | <b>Atp60v</b>      |               |
|------------------|------------|------------------|------------|-------------------|------------|-------------------|------------|--------------------|---------------|
| gene             | weight     | gene             | weight     | gene              | weight     | gene              | weight     | gene               | weight        |
| frog_foxi1       | 1.7946975  | frog_dmrt2       | 1.1082501  | zebrafish_cldna   | 0.47487783 | frog_ubp1         | 1.4286531  | frog_atp6v0c       | 1.5118276     |
| zebrafish_foxi3a | 1.7876347  | zebrafish_dmrt2a | 1.0135943  | zebrafish_cldnh   | 0.46664542 | frog_grhl3        | 1.1210046  | zebrafish_atp6v0cb | 1.0511838     |
| zebrafish_foxi1  | 1.7752392  | frog_kank1       | 0.9281069  | frog_cldn4        | 0.45497242 | frog_grhl1        | 1.0977421  | zebrafish_atp6v0ca | 0.6842436     |
| zebrafish_foxg1a | 1.767095   | zebrafish_gcm2   | 0.4140955  | zebrafish_cldnb   | 0.40522912 | zebrafish_grhl3   | 1.03748    | frog_atp6v0b       | 0.33991408    |
| frog_foxg1       | 1.6482608  | zebrafish_dmrt2b | 0.3073387  | zebrafish_cldne   | 0.38158783 | zebrafish_grhl2a  | 0.85601187 | zebrafish_atp6v0b  | 0.18918027    |
| frog_foxi4.2     | 1.6366866  | zebrafish_cxxc4  | 0.14239863 | zebrafish_lhfp13  | 0.30014035 | zebrafish_tp63    | 0.6001469  | frog_cnih1         | 0.0017733343  |
| frog_foxi2       | 1.598392   | frog_cxxc4       | 0.1175361  | zebrafish_cldnc   | 0.24535778 | frog_grhl2        | 0.54704624 | frog_sec61g        | 0.0010816682  |
| zebrafish_foxg1b | 0.92830807 | frog_foxi1       | 0.09924057 | frog_lhfp14       | 0.24350967 | zebrafish_grhl1   | 0.44004646 | frog_eif1ax        | 0.00058003364 |
| zebrafish_foxh1  | 0.7387778  | zebrafish_skor1b | 0.09714537 | zebrafish_lhfp15a | 0.2244674  | zebrafish_lfcp211 | 0.4264244  | zebrafish_sec61g   | 0.00044005408 |
| frog_foxe1       | 0.48347607 | frog_hivep1      | 0.07280374 | zebrafish_lhfp15b | 0.18170683 | frog_tp63         | 0.30589458 | zebrafish_rpl34    | 0.0004284728  |

**Supplementary Table 1: Frog and Zebrafish differentially expressed macrogenes' gene to macrogene weights.** Gene to macrogene weights for the top 10 genes for each differentially expressed macrogene in Figure 2b. Genes are listed in descending order by weight.

| Frog Cell Type           | Zebrafish Cell Type      | # of Frog Cells | # of Zebrafish Cells | Total # of Cells |
|--------------------------|--------------------------|-----------------|----------------------|------------------|
| Hindbrain                | Hindbrain                | 7273            | 9399                 | 16672            |
| Intermediate mesoderm    | Intermediate mesoderm    | 10324           | 3120                 | 13444            |
| Forebrain/midbrain       | Forebrain/midbrain       | 2081            | 10500                | 12581            |
| Epidermal progenitor     | Epidermal progenitor     | 9149            | 1921                 | 11070            |
| Non-neural ectoderm      | Non-neural ectoderm      | 8022            | 2227                 | 10249            |
| Neural crest             | Neural crest             | 8393            | 1769                 | 10162            |
| Neuroectoderm            | Neuroectoderm            | 6590            | 3381                 | 9971             |
| Placodal area            | Placodal area            | 6918            | 1188                 | 8106             |
| Presomitic mesoderm      | Presomitic mesoderm      | 6293            | 1642                 | 7935             |
| Skeletal muscle          | Skeletal muscle          | 5772            | 651                  | 6423             |
| Neuron                   | Neuron                   | 1899            | 4032                 | 5931             |
| Tailbud                  | Tailbud                  | 1860            | 3759                 | 5619             |
| Optic                    | Optic                    | 1475            | 3676                 | 5151             |
| Blood                    | Blood                    | 1569            | 3067                 | 4636             |
|                          | Pluripotent              | 0               | 4277                 | 4277             |
| Involuting marginal zone | Involuting marginal zone | 2385            | 1849                 | 4234             |
| Endoderm                 | Endoderm                 | 2207            | 890                  | 3097             |
| Eye primordium           | Eye primordium           | 2477            | 223                  | 2700             |
| Endothelial              | Endothelial              | 1002            | 884                  | 1886             |
| Goblet cell              |                          | 1473            | 0                    | 1473             |
| Small secretory cells    |                          | 1335            | 0                    | 1335             |
| Ionocyte                 | Ionocyte                 | 1030            | 292                  | 1322             |
| Notochord                | Notochord                | 766             | 351                  | 1117             |
| Blastula                 |                          | 1116            | 0                    | 1116             |
| Otic placode             | Otic placode             | 813             | 270                  | 1083             |
| Heart                    | Heart                    | 121             | 851                  | 972              |
| Spemann organizer        |                          | 963             | 0                    | 963              |
| Myeloid progenitors      |                          | 778             | 0                    | 778              |
| Pronephric mesenchyme    |                          | 777             | 0                    | 777              |
| Cement gland primordium  |                          | 721             | 0                    | 721              |
| Lens                     | Lens                     | 458             | 210                  | 668              |
|                          | Rare epidermal subtypes  | 0               | 513                  | 513              |
| Notoplate                | Notoplate                | 339             | 115                  | 454              |
| Rohon-beard neuron       | Rohon-beard neuron       | 134             | 289                  | 423              |
| Olfactory placode        | Olfactory placode        | 139             | 276                  | 415              |
|                          | Macrophage               | 0               | 405                  | 405              |
|                          | Periderm                 | 0               | 382                  | 382              |
| Hatching gland           | Hatching gland           | 180             | 82                   | 262              |
|                          | Dorsal organizer         | 0               | 233                  | 233              |
|                          | Pharyngeal pouch         | 0               | 209                  | 209              |
|                          | Apoptotic-like           | 0               | 163                  | 163              |
|                          | Pronephric duct          | 0               | 95                   | 95               |
| Germline                 | Germline                 | 33              | 53                   | 86               |
| Neuroendocrine cell      |                          | 70              | 0                    | 70               |
|                          | Pancreas primordium      | 0               | 49                   | 49               |
|                          | Secretory epidermal      | 0               | 34                   | 34               |
|                          | Apoptotic-like 2         | 0               | 33                   | 33               |
|                          | Forerunner cells         | 0               | 5                    | 5                |
|                          | Epiphysis                | 0               | 3                    | 3                |
|                          | Nanog-high               | 0               | 3                    | 3                |
| Totals: 36               | 42                       | 96935           | 63371                | 160306           |

**Supplementary Table 2: Cell Type Matching and Frequencies in Frog and Zebrafish Embryogenesis.** Cell type pairs used for scoring frog and zebrafish embryogenesis embeddings, and cell type counts.

| Cluster | Macrogene | Human Genes             | Cynomologus Macaque Genes | Rhesus Macaque Genes    | Mouse Genes            | Pig Genes              |
|---------|-----------|-------------------------|---------------------------|-------------------------|------------------------|------------------------|
| 1       | 1540      | Col6A2, Vit, Col6A6     | Vit, Col28A1, Antxr2      | Col6A2, Col28A1, Vit    | Col6A1, Col6A2, Vit    | Vit, Antxr2, Col6A2    |
| 1       | 71        | Rpp25, Sco2, Siglec1    | Adam15, Siglec1, Nop9     | Adam15, Lhb, Kcp        | Ptpn18                 | C4A, Kcnk7, Rpp25      |
| 2       | 1115      | Cxcl12, Ccl25           | Cxcl12                    | Ccl25, Cxcl14           | Cxcl12                 | Cxcl12                 |
| 2       | 197       | Nr2F1, Nr2F2            | Nr2F1, Nr2E3, Nr2E1       | Nr2F2, Nr2F1, Nr2E3     | Nr2F1, Nr2F2, Nr2E3    | Nr2F1, Nr2F2, Nr0B2    |
| 3       | 232       | Tagln, Tagln2, Tagln3   | Tagln, Tagln3             | Tagln, Tagln2           | Tagln, Tagln3          | Tagln, Tagln3          |
| 3       | 583       | Rspo2, Rspo3            | Rspo2, Rspo3              | Rspo2, Rspo3            | Rspo3, Rspo2, Rspo1    | Rspo3, Rspo2           |
| 4       | 748       | Bgn                     |                           |                         |                        |                        |
| 4       | 433       | Prepl, Ogn, Aspnl       | Ogn, Kera, Prepl          | Ogn, Prepl, Optc        | Dcn, Fmod, Optc        | Omd, Ogn, Ecm2         |
| 4       | 479       | Angptl7, Fgl2, Angptl1  | Fgl2, Angptl7, Fgb        | Fgl2, Angptl7, Fgg      | Fgl2, Angptl7, Angptl2 | Fgl2, Angptl7, Fibcd1  |
| 4       | 1273      | Tnxb, Matn2, Tnr        | Tnc, Morn4                | Morn4, Tnc, Matn2       | Tnxb                   | Zcchc13, Tnc, Tnr      |
| 5       | 1300      | Ca3, Ca13, Ca7          | Ca2, Ca7, Ca3             | Ca3, Ca2, Ca13          | Car3, Car2, Car13      | Ca2, Ca3, Ca7          |
| 5       | 73        | Slc4A7, Slc4A4, Slc4A10 | Slc4A10, Slc4A7, Slc4A4   | Slc4A10, Slc4A7, Slc4A4 | Slc4A4, Slc4A5         | Slc4A4, Slc4A7, Slc4A5 |
| 5       | 97        | Fgf6, Fgf23, Fgf16      | Fgf21, Fgf19, Fgf10       | Fgf10, Fgf8, Fgf9       | Fgf10, Fgf5, Fgf21     | Fgf10, Fgf22, Fgf21    |

**Supplementary Table 3: Differentially expressed macrogenes in regrouped AH Atlas cell types.** Genes in the table represent the corresponding species' top 3 genes per macrogene, ordered by weight and with weights above 0.5.



## Supplementary Data References

1. Tabula Sapiens Consortium et al. The Tabula Sapiens: A multiple-organ, single-cell transcriptomic atlas of humans. *Science* **376**, eabl4896 (2022).
2. Consortium, T. T. M. *et al.* Tabula Microcebus: A transcriptomic cell atlas of mouse lemur, an emerging primate model organism. *BioRxiv* (2021).
3. Tabula Muris Consortium. Single-cell transcriptomics of 20 mouse organs creates a Tabula Muris. *Nature* **562**, 367–372 (2018).
4. Butler, A., Hoffman, P., Smibert, P., Papalexi, E. & Satija, R. Integrating single-cell transcriptomic data across different conditions, technologies, and species. *Nature Biotechnology* **36**, 411–420 (2018).
5. Wolf, F. A., Angerer, P. & Theis, F. J. SCANPY: large-scale single-cell gene expression data analysis. *Genome Biology* **19**, 15 (2018).
6. Korsunsky, I. *et al.* Fast, sensitive and accurate integration of single-cell data with Harmony. *Nature Methods* **16**, 1289–1296 (2019).
7. Lopez, R., Regier, J., Cole, M. B., Jordan, M. I. & Yosef, N. Deep generative modeling for single-cell transcriptomics. *Nature Methods* **15**, 1053–1058 (2018).
8. Hie, B., Bryson, B. & Berger, B. Efficient integration of heterogeneous single-cell transcriptomes using Scanorama. *Nature Biotechnology* **37**, 685–691 (2019).
9. Klopfenstein, D. *et al.* GOATOOLS: A python library for gene ontology analyses. *Scientific reports* **8**, 1–17 (2018).
10. Lloyd, S. Least squares quantization in PCM. *IEEE Transactions on Information Theory* **28**, 129–137 (1982).
